# Supplementary material for: An Indirect Defence Trait Mediated through Egg-Induced Maize Volatiles from Neighbouring Plants
Source: PLoS One. 2016 Jul 8;11(7):e0158744. doi: 10.1371/journal.pone.0158744 (PMC4938388; doi:10.1371/journal.pone.0158744)
Supplement: S1 File — Tables A, B and C. (XLS) [file pone.0158744.s001.xls]

## Sheet: Table A
Table A: Response of Trichogramma bournieri and Cotesia sesamiae on oviposited Nyamula plant
T. bournieri response								C. sesamiae response
Replicate	Treatment	Control	Solvent 1	Solvent 2	Solvent AVG			Replicate	Treatment	Control	Solvent 1	Solvent 2	Solvent AVG
R1	5.15	3.48	3.63	0.43	2.03			R1	3.62	3.48	1.12	1.77	1.445
R2	5.75	0.97	2.27	3.17	2.72			R2	4.88	2.05	0.12	1.68	0.9
R3	2.07	2.4	2.95	1.68	2.315			R3	4.4	3.03	1.57	0.25	0.91
R4	3.57	3.03	2.14	0.38	1.26			R4	1.62	0.73	1.62	2.98	2.3
R5	4.85	1.63	0.97	0.2	0.585			R5	1.87	2.62	0.83	4.17	2.5
R6	3.3	1.28	2.62	1.98	2.3			R6	4.08	1.6	3.35	2.75	3.05
R7	2.52	2.78	3.48	2.4	2.94			R7	4.58	0.6	0.17	1.33	0.75
R8	4.23	2.73	1	1.7	1.35			R8	3.27	1.45	3.42	1.42	2.42
R9	2.01	1.8	2.72	2.37	2.545			R9	4.62	0.9	3.63	0.77	2.2
R10	1.13	1.07	0.63	1.15	0.89			R10	2.77	1.08	1.48	2.68	2.08
R11	4.72	1.15	0.15	3.21	1.68			R11	4.88	1.65	0.85	1.27	1.06
R12	5.36	1.03	3	0.17	1.585			R12	4.73	1.85	0.42	0.35	0.385

## Sheet: Table B
Table B: Response of Trichogramma bournieri and Cotesia sesamiae on induced Nyamula plant
T. bournieri response								C. sesamiae response
Replicate	Treatment	Control	Solvent 1	Solvent 2	Solvent AVG			Treatment	Control	Solvent	Solvent	Solvent AVG
R1	2.12	1.22	3.63	1.68	2.655			2.75	0.88	1.77	1.27	1.52
R2	2.8	2.32	1.07	2.4	1.735			3.18	1.82	3.92	0.55	2.235
R3	3.03	0.88	3.1	0.58	1.84			4	1.17	1.36	1.22	1.29
R4	2.73	2.13	1.78	1.57	1.675			3.5	0.55	2	1.25	1.625
R5	2.13	1.55	2.37	0.47	1.42			4.62	0.83	2.07	1.57	1.82
R6	3.15	2.3	0.9	1.53	1.215			1.85	3.42	0.12	0.48	0.3
R7	2.1	1.2	0.73	1.12	0.925			4.27	2.58	0.12	0.05	0.085
R8	3.4	1.57	1.5	0.53	1.015			4.5	1.35	1.32	1.03	1.175
R9	3.85	2.75	1.45	1.82	1.635			3.37	1.45	2.93	0.55	1.74
R10	3.55	2.88	1	1.4	1.2			2.67	1.63	0.45	2.18	1.315
R11	3.3	2.5	0.8	1.89	1.345			4.65	1.92	0.23	0.2	0.215
R12	3.05	1.01	2.74	2.1	2.42			2.13	1.6	1.87	0.63	1.25

## Sheet: Table C
Table C: Response of Trichogramma bournieri and Cotesia sesamiae on induced HB515 plant
T. bournieri response								C. sesamiae response
Replicate	Treatment	Control	Solvent-1	Solvent-2	Avg Solvent		Replicate	Treatment	Control	Solvent-1	Solvent-2	Avg Solvent
R-1	1.22	2.78	2.3	2.78	2.54		R-1	2.42	2.15	1.5	3.25	2.375
R-2	1.42	1.98	2.32	1.77	2.045		R-2	1.62	3.68	1.67	2.88	2.275
R-3	2.1	2.8	1.75	1.8	1.775		R-3	3.47	1.72	2.43	1.92	2.175
R-4	1.3	1.9	1.85	0.9	1.375		R-4	2.43	1.85	3	3.3	3.15
R-5	1.15	1.57	2.47	1.23	1.85		R-5	3.57	1.6	4.85	0.47	2.66
R-6	4.32	1.85	1.92	3.05	2.485		R-6	1.37	1.13	2.13	1.3	1.715
R-7	1.23	1.72	2.13	3.9	3.015		R-7	0.15	1	1.88	3.67	2.775
R-8	2.72	1.28	2.33	0.3	1.315		R-8	3.95	1.78	3.92	0.77	2.345
R-9	2.43	1.48	1.43	0.03	0.73		R-9	3.27	1.72	2.22	2.17	2.195
R-10	1.22	1.83	2.1	0.42	1.26		R-10	2.4	0.62	4.35	2.78	3.565
R-11	2.77	3.25	3.37	0.33	1.85		R-11	0.95	1.6	1.8	2.93	2.365
R-12	2.4	1.08	3.48	2.15	2.815		R-12	1.93	5.03	1.45	0.95	1.2
